# Supplementary material for: Oncogenic Gq/11 signaling acutely drives and chronically sustains metabolic reprogramming in uveal melanoma
Source: PubMed Central journal article supplement — J Biol Chem. 2021 Dec 14;298(1):101495. doi: 10.1016/j.jbc.2021.101495 (PMC8761705; doi:10.1016/j.jbc.2021.101495), 2021-12-14
Supplement: mmc1.pdf [file mmc1.pdf]

# Supplemental Figure S1

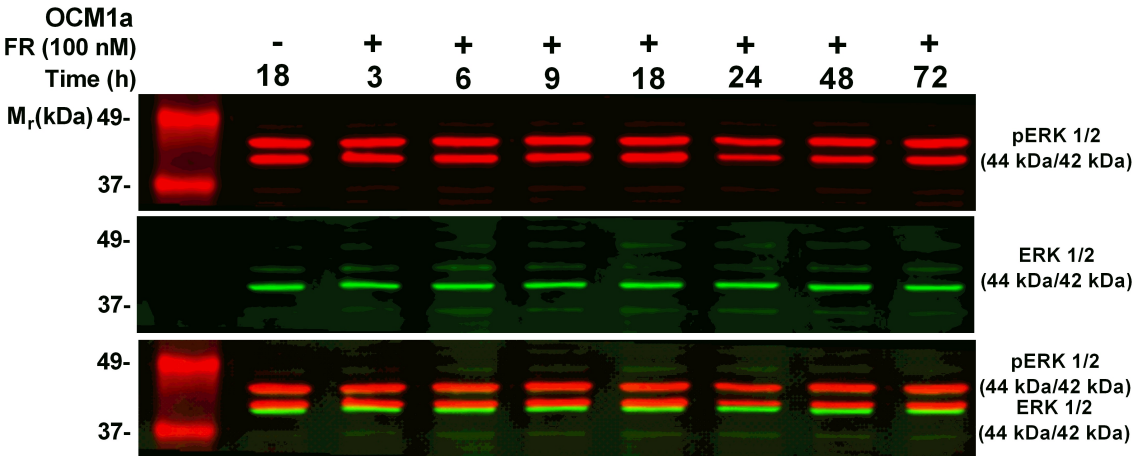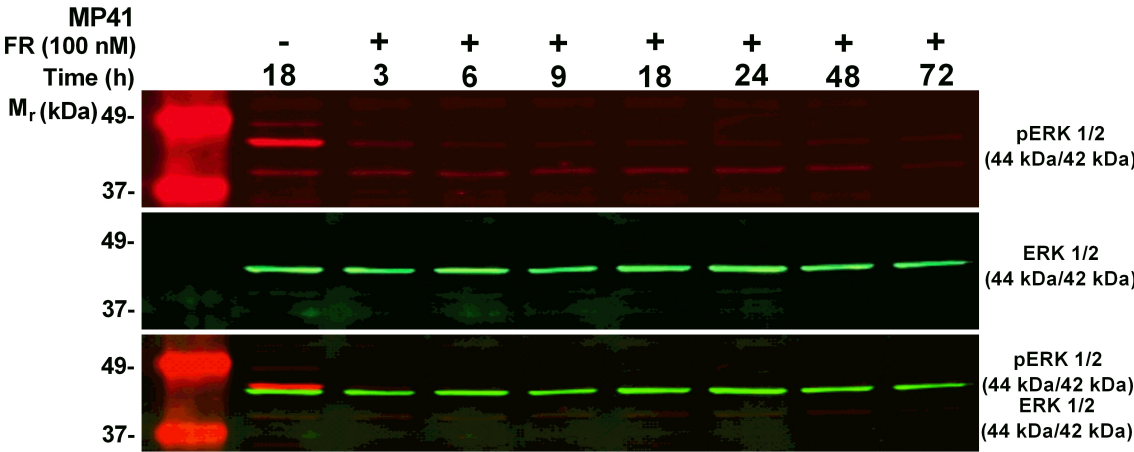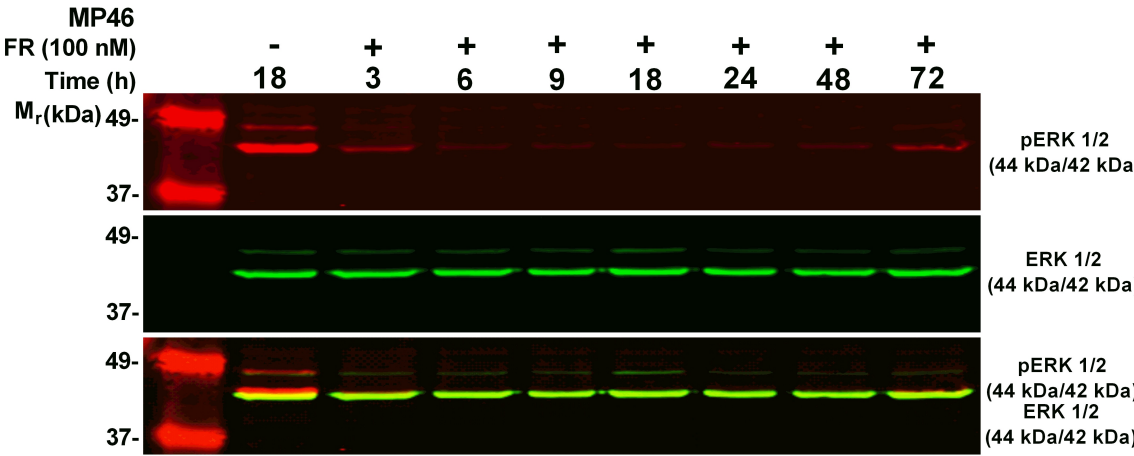

**Supplemental Figure S1. ERK immunoblots for FR time course.** Representative blots from three independent experiments. MP41, MP46, and OCM-1A cells were treated with 100 nM FR for the indicated time, and then lysed to collect protein. Lysates were subjected to PAGE and immunoblotted for pERK1/2 (44 kDa / 42 kDa; red) or total ERK1/2 (44 kDa / 42 kDa; green). Imaging and fluorescence intensity measurements were performed on a LI-COR Odyssey system.

# Supplemental Figure S2

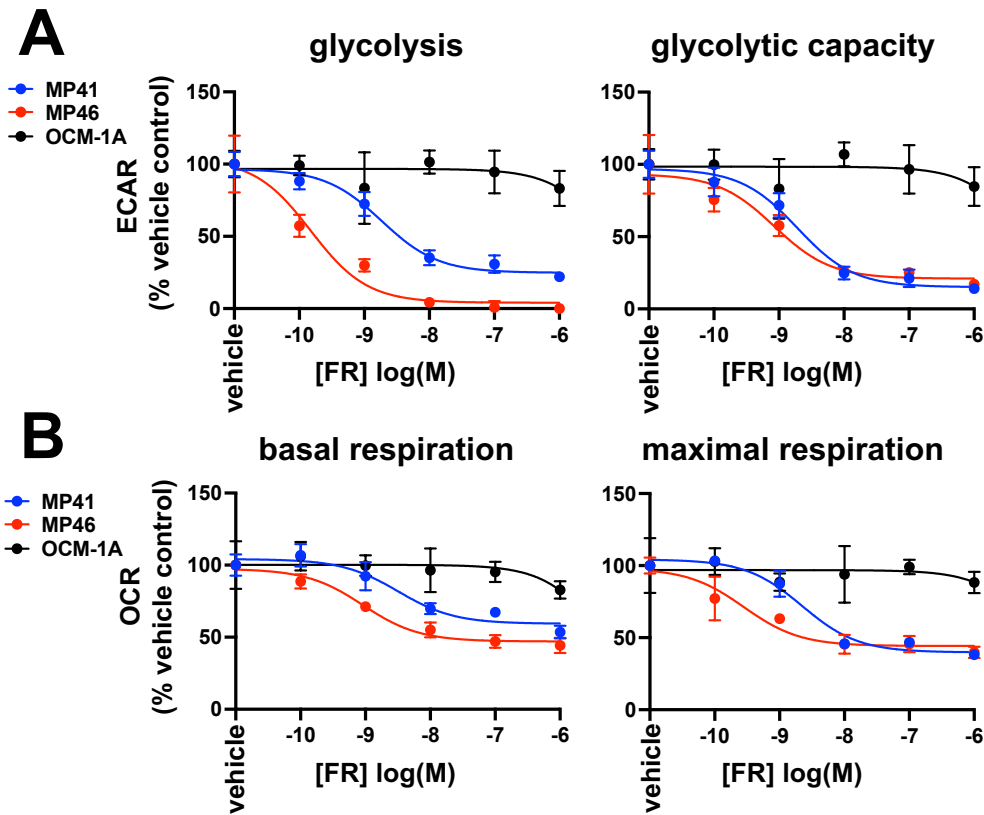

## Supplemental Figure S2. FR dose response curves for UM cell metabolism.

Representative graphs from three independent experiments. MP41, MP46, and OCM-1A cells were treated with the indicated concentrations of FR or vehicle (DMSO) for 18 h prior to Seahorse analysis. ECAR and OCR values were normalized to cell number per well based on DAPI staining, and then values for each cell line were normalized to vehicle control for that line. A. Graphs show glycolysis and glycolytic capacity as measured using the glycolytic stress test on the Seahorse analyzer. B. Graphs show basal and maximal respiration as measured using the mitochondrial stress test on the Seahorse analyzer. Gq/11-driven MP41 and MP46 cells show dose-dependent response to FR within a nanomolar dose range. No dose-response is seen in Gq/11-wildtype OCM-1A cells.

# Supplemental Figure S3

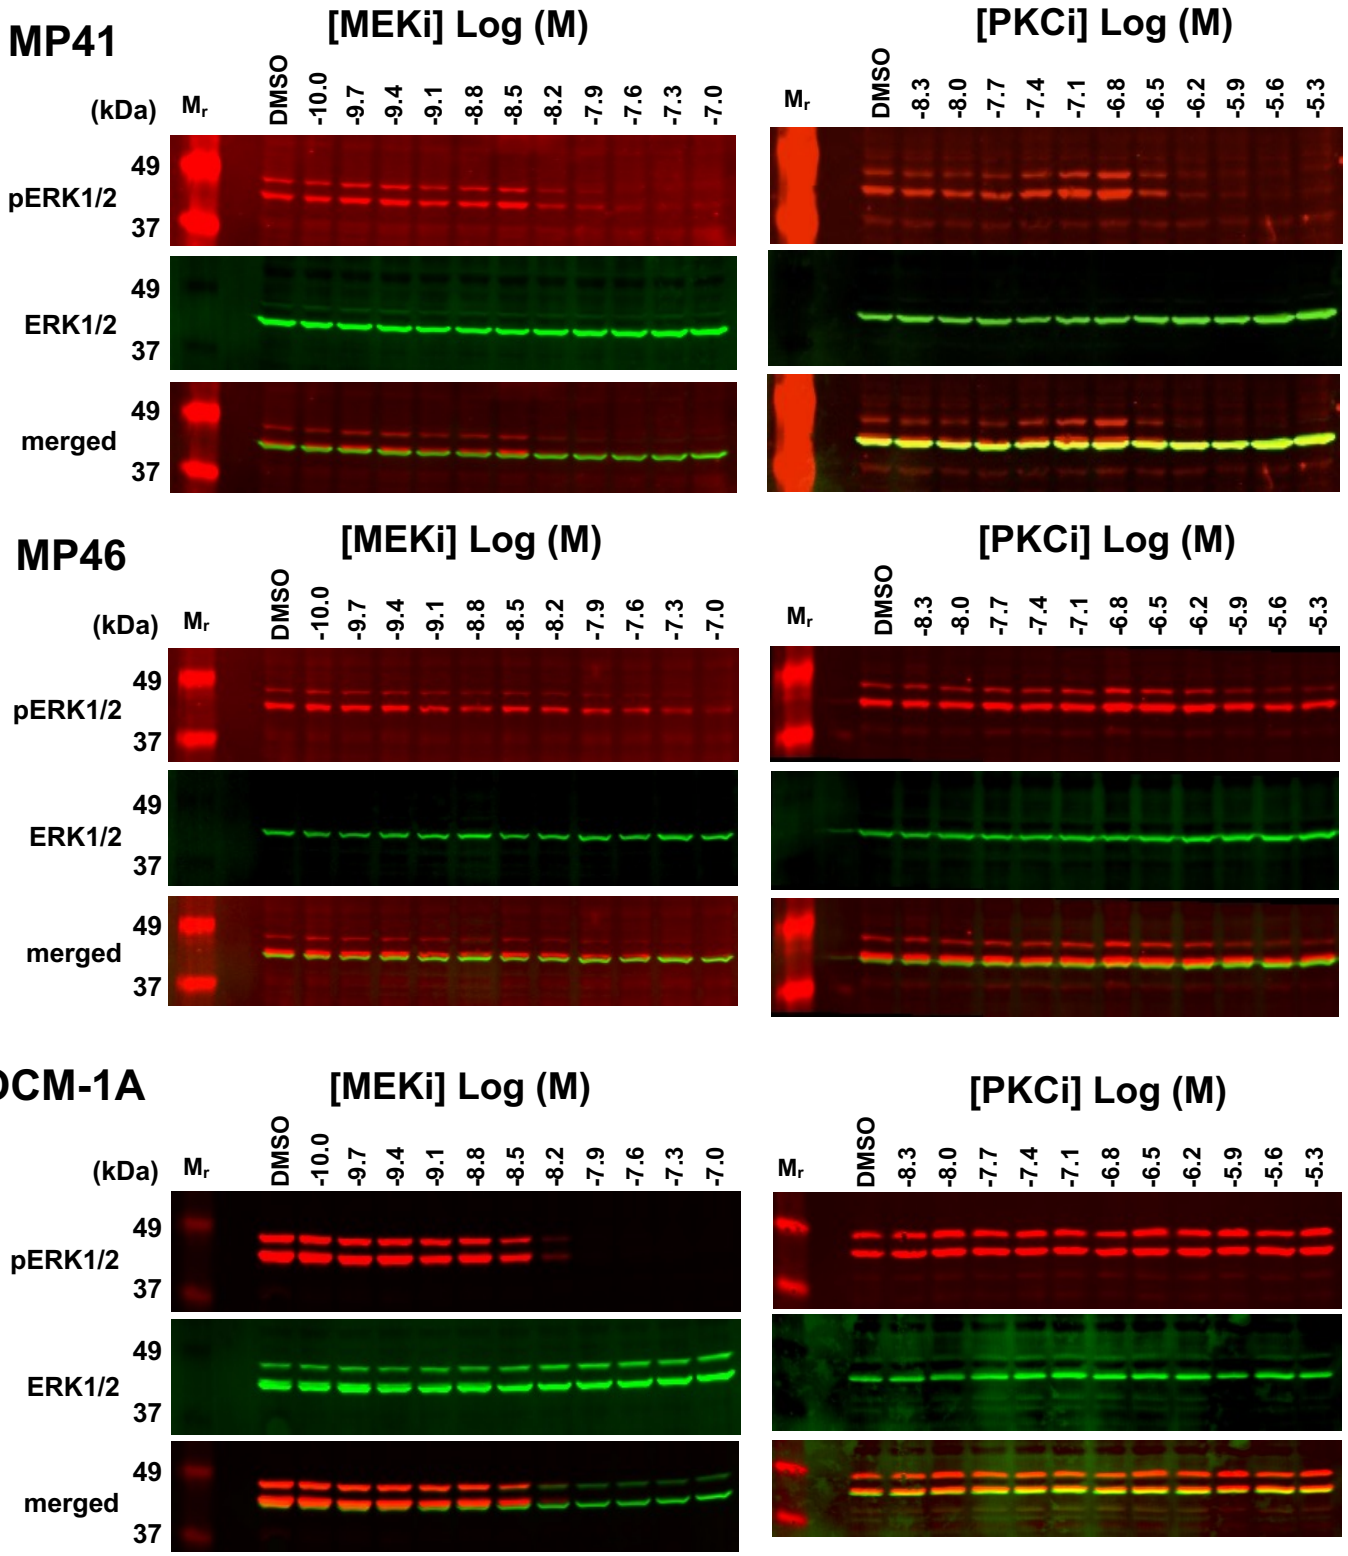

**Supplemental Figure S3. ERK immunoblots for MEKi and PKCi dose curve.** Representative blots from four independent experiments. MP41, MP46, and OCM-1A cells were treated with MEKi or PKCi at the indicated doses for 18 hours, and then lysed to collect protein. Lysates were subjected to PAGE and immunoblotted for pERK1/2 (44 kDa / 42 kDa; red) or total ERK1/2 (44 kDa / 42 kDa; green). Imaging and fluorescence intensity measurements were performed on a LI-COR Odyssey system.

# Supplemental Table S1

| Cell line name | Driver oncogene      | Molecular class | Source | Research Resource Identifier (RRID) |
|----------------|----------------------|-----------------|--------|-------------------------------------|
| MP41           | <i>GNA11</i> (Q209L) | 1               | UM PDX | CVCL_4D12                           |
| MP46           | <i>GNAQ</i> (Q209L)  | 2 (BAP1-null)   | UM PDX | CVCL_4D13                           |
| 92.1           | <i>GNAQ</i> (Q209L)  | 1               | UM     | CVCL_8607                           |
| Mel202         | <i>GNAQ</i> (Q209L)  | 1               | UM     | CVCL_C301                           |
| Mel270         | <i>GNAQ</i> (Q209P)  | 1               | UM     | CVCL_C302                           |
| OCM-1A         | <i>BRAF</i> (V600E)  | 1               | UM     | CVCL_6934                           |
| A375           | <i>BRAF</i> (V600E)  | n/a             | CM     | CVCL_0132                           |
| MeWo           | <i>NF1</i> -null     | n/a             | CM     | CVCL_0445                           |
| SK-mel-2       | <i>NRAS</i> (Q61R)   | n/a             | CM     | CVCL_0069                           |

**Supplemental Table S4. Cell lines used for this project.** The driver oncogenic mutation is given for each cell line. Gene expression class (tumor grade) is given for cell lines derived from UM tumors. MP41 and MP46 were initially derived as patient-derived xenografts in mice and then moved to cell culture. All other cells lines were derived initially in culture.

# Supplemental Table S2

| Materials and Reagents                          |                                      |                |
|-------------------------------------------------|--------------------------------------|----------------|
| Description                                     | Company                              | Catalog Number |
| <i>Internal Standards</i>                       |                                      |                |
| 13C3 Sodium Pyruvate                            | Cambridge Isotope Laboratories, Inc. | CLM-2440-0.5   |
| 13C3 Sodium Lactate                             | Cambridge Isotope Laboratories, Inc. | CLM-1579-0.5   |
| 13C6 Citric Acid                                | Cambridge Isotope Laboratories, Inc. | CLM-9021-PK    |
| 13C4 alpha-ketoglutaric acid sodium salt        | Cambridge Isotope Laboratories, Inc. | CLM-4442-0.1MG |
| 13C4 Succinic acid                              | Cambridge Isotope Laboratories, Inc. | CLM-1571-0.1MG |
| 13C4 Fumaric acid                               | Cambridge Isotope Laboratories, Inc. | CLM-1529-0.1MG |
| 13C4 L-Malic acid                               | Cambridge Isotope Laboratories, Inc. | CLM-8065-0.1MG |
| Stable isotope labeled canonical amino acid mix | Cambridge Isotope Laboratories, Inc. | MSK-CAA-1      |
| U-13C16 Sodium Palmitate                        | Cambridge Isotope Laboratories, Inc. | CLM-6059-1     |
| <i>Derivatization materials</i>                 |                                      |                |
| Methoxyamine hydrochloride                      | Sigma-Aldrich                        | 226904-1G      |
| Pyridine anhydrous 99.8%                        | Sigma-Aldrich                        | 270970-25ML    |
| MTBSTFA (with 1% t-BDMCS)                       | Sigma-Aldrich                        | M-108-5x1ML    |
| <i>GC vials and inserts</i>                     |                                      |                |
| Vial inserts                                    | National                             | C4011-631      |
| Clear glass autosampler vials                   | National                             | C4000-1        |
| Vial caps                                       | National                             | C5000-51B      |
| <i>GC-MS instrumentation</i>                    |                                      |                |
| Agilent 7890A gas chromatograph                 | Agilent                              |                |
| Agilent 5975C mass spectrometer                 | Agilent                              |                |
| ChemStation E.02.02.1431                        | Agilent                              |                |
| <i>BCA Assay</i>                                |                                      |                |
| Pierce BCA Protein Assay Kit                    | Thermo Fisher                        | 23227          |
| RIPA Lysis Buffer system                        | Santa Cruz Biotechnology             | Sc-24948A      |

**Supplemental Table S5. Materials and reagents used for GC-MS experiments.** Sources are listed for reagents and equipment used in this study. Catalog numbers are included for reagents.

# Supplemental Table S3

| Metabolite ions monitored for FR900359 studies                                       |                     |
|--------------------------------------------------------------------------------------|---------------------|
| Metabolites ( <b>IS in bold</b> )                                                    | Ions                |
| Pyruvate, <sup>13</sup> C <sub>3</sub> <b>Pyruvate</b>                               | 174.0, <b>177.0</b> |
| Lactate, <sup>13</sup> C <sub>3</sub> <b>Lactate</b>                                 | 261.1, <b>264.1</b> |
| Citrate, <sup>13</sup> C <sub>6</sub> <b>Citrate</b>                                 | 459.3, <b>465.3</b> |
| alpha-ketoglutaric acid, <sup>13</sup> C <sub>4</sub> <b>alpha-ketoglutaric acid</b> | 346.1, <b>350.1</b> |
| Succinic acid, <sup>13</sup> C <sub>4</sub> <b>Succinic acid</b>                     | 289.1, <b>293.1</b> |
| Fumaric acid, <sup>13</sup> C <sub>4</sub> <b>Fumaric acid</b>                       | 287.1, <b>291.1</b> |
| Malic acid, <sup>13</sup> C <sub>4</sub> <b>Malic acid</b>                           | 419.3, <b>423.3</b> |

**Supplemental Table S6. Metabolite ions monitored for FR responses.**  
Ion values are listed for each metabolite and its labeled controls (bold).
